# Supplementary material for: Theoretical unraveling of the separation of trivalent Am and Eu ions by phosphine oxide ligands with different central heterocyclic moieties
Source: Royal Society of Chemistry journal article supplement (doi:10.1039/d2dt00509c), 2022-01-01
Supplement: d2dt00509c1.pdf [file d2dt00509c1.pdf]

## Theoretically unraveling the separation of trivalent Am and Eu ions by phosphine oxide ligands with different central heterocyclic moieties

Pin-Wen Huang

Zhejiang University of Water Resources and Electric Power

### Table of content

1. Figure S1 Optimized structures of  $\text{EuL}(\text{NO}_3)_3$ ,  $[\text{Eu}(\text{L})_2]^{3+}$  complexes,
2. Figure S2 Optimized structures of  $[\text{Am}(\text{L})_2\text{NO}_3]^{2+}$ ,  $[\text{Eu}(\text{L})_2\text{NO}_3]^{2+}$  complexes,
3. Table S1 Average M-O and M-N bond length ( $\text{\AA}$ ) in  $[\text{ML}_2\text{NO}_3]^{2+}$  complexes,
4. Table S2. The Mayer bond orders of M-N and M-O<sub>P=O</sub> bonds in  $[\text{ML}_2(\text{NO}_3)]^{2+}$  complexes.
5. Table S3. The Wiberg bond indices of M-N and M-O<sub>P=O</sub> bonds in  $\text{ML}(\text{NO}_3)_3$  and  $[\text{M}(\text{L})_2]^{3+}$  complexes.
6. Table S4. Changes in Gibbs free energy ( $\Delta G$ , kcal/mol) for the extraction reactions with  $\text{Ph}_2\text{PyPO}$  ( $\text{L}^a$ ),  $\text{Ph}_2\text{BipyPO}$  ( $\text{L}^b$ ) and  $\text{Ph}_2\text{PhenPO}$  ( $\text{L}^c$ ) and  $\text{M}(\text{H}_2\text{O})_9^{3+}$  in aqueous-nitrobenzene solution.

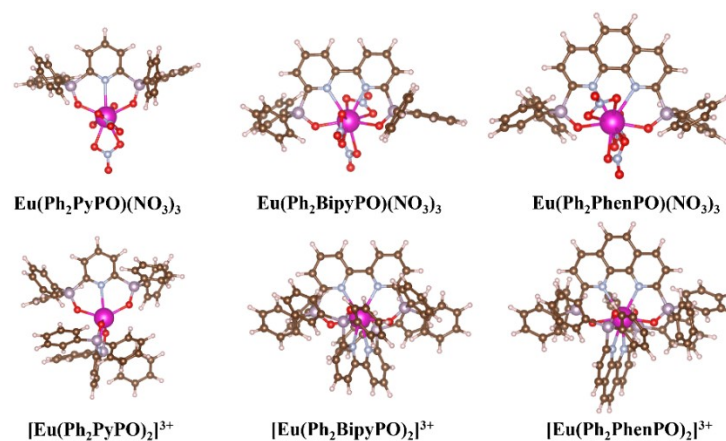

**Figure S1** Optimized structures of the studied  $\text{EuL}(\text{NO}_3)_3$ ,  $[\text{Eu}(\text{L})_2]^{3+}$  complexes with  $\text{L} = \text{Ph}_2\text{PyPO}$ ,  $\text{Ph}_2\text{BipyPO}$ , and  $\text{Ph}_2\text{PhenPO}$ , respectively.

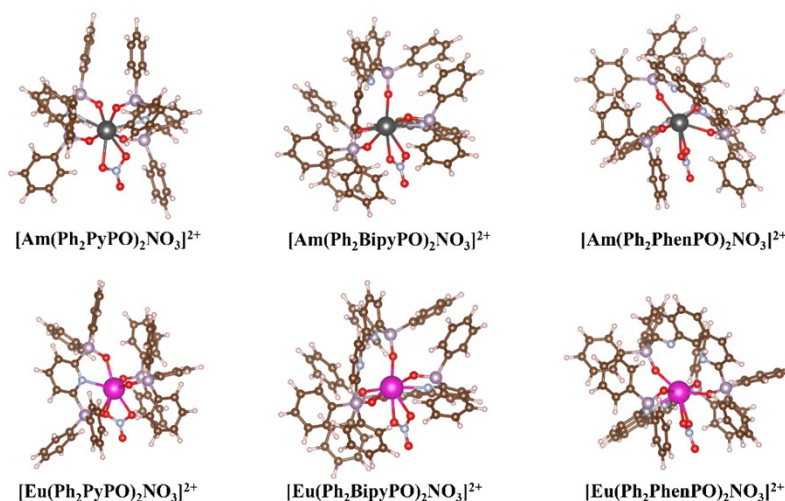

**Figure S2** Optimized structures of the studied  $[\text{Am}(\text{L})_2\text{NO}_3]^{2+}$  and  $[\text{Eu}(\text{L})_2\text{NO}_3]^{2+}$  complexes with  $\text{L} = \text{Ph}_2\text{PyPO}$ ,  $\text{Ph}_2\text{BipyPO}$ , and  $\text{Ph}_2\text{PhenPO}$ , respectively.

**Table S1.** Average M-O and M-N bond length (Å) in  $[\text{ML}_2\text{NO}_3]^{2+}$  complexes, optimized at the B3LYP/6-311g(d)//RECP level of theory. <sup>a</sup>

| Complex                                                    | Bond length                  |                    |
|------------------------------------------------------------|------------------------------|--------------------|
|                                                            | M-N                          | M-O <sub>P=O</sub> |
| $[\text{M}(\text{Ph}_2\text{PyPO})_2(\text{NO}_3)]^{2+}$   | 2.856/2.820                  | 2.410/2.360        |
| $[\text{M}(\text{Ph}_2\text{BipyPO})_2(\text{NO}_3)]^{2+}$ | 2.760/2.709<br>(3.690/3.892) | 2.426/2.364        |
| $[\text{M}(\text{Ph}_2\text{PhenPO})_2(\text{NO}_3)]^{2+}$ | 2.790/2.715<br>(3.370/3.624) | 2.439/2.379        |

<sup>a</sup>... /... represents results of M=Am and M=Eu, respectively.

**Table S2.** The Mayer bond orders of M-N and M-O<sub>P=O</sub> bonds in  $[\text{ML}_2(\text{NO}_3)]^{2+}$  complexes. <sup>a</sup>

| Complex                                                    | M-N                          | M-O <sub>P=O</sub> |
|------------------------------------------------------------|------------------------------|--------------------|
| $[\text{M}(\text{Ph}_2\text{BipyPO})_2(\text{NO}_3)]^{2+}$ | 0.172/0.162<br>(0.088/0.037) | 0.301/0.314        |
| $[\text{M}(\text{Ph}_2\text{PhenPO})_2(\text{NO}_3)]^{2+}$ | 0.171/0.175<br>(0.106/0.054) | 0.279/0.307        |

<sup>a</sup>... /... represents results of M=Am and M=Eu, respectively.

**Table S3.** The Wiberg bond indices of M-N and M-OP=O bonds in the studied metal complexes. <sup>a</sup>

| Complex                                             | M-N         | M-O <sub>P=O</sub> |
|-----------------------------------------------------|-------------|--------------------|
| $\text{M}(\text{Ph}_2\text{PyPO})(\text{NO}_3)_3$   | 0.167/0.155 | 0.311/0.332        |
| WBI(Am-N/O)- WBI(Eu-N/O)                            | 0.012       | -0.021             |
| $\text{M}(\text{Ph}_2\text{BipyPO})(\text{NO}_3)_3$ | 0.198/0.195 | 0.325/0.338        |
| WBI(Am-N/O)- WBI(Eu-N/O)                            | 0.003       | -0.013             |
| $\text{M}(\text{Ph}_2\text{PhenPO})(\text{NO}_3)_3$ | 0.194/0.188 | 0.334/0.345        |
| WBI(Am-N/O)- WBI(Eu-N/O)                            | 0.006       | -0.011             |
| $[\text{M}(\text{Ph}_2\text{PyPO})_2]^{3+}$         | 0.386/0.341 | 0.737/0.797        |
| WBI(Am-N/O)- WBI(Eu-N/O)                            | 0.045       | -0.060             |
| $[\text{M}(\text{Ph}_2\text{BipyPO})_2]^{3+}$       | 0.435/0.414 | 0.758/0.784        |
| WBI(Am-N/O)- WBI(Eu-N/O)                            | 0.021       | -0.026             |
| $[\text{M}(\text{Ph}_2\text{PhenPO})_2]^{3+}$       | 0.410/0.408 | 0.746/0.769        |
| WBI(Am-N/O)- WBI(Eu-N/O)                            | 0.002       | -0.023             |

<sup>a</sup>.../... represents results of Am- and Eu-complexes, respectively.

**Table S4.** Changes in Gibbs free energy ( $\Delta G$ , kcal/mol) for the extraction reactions with Ph<sub>2</sub>PyPO (L<sup>a</sup>), Ph<sub>2</sub>BipyPO (L<sup>b</sup>) and Ph<sub>2</sub>PhenPO (L<sup>c</sup>) in aqueous-nitrobenzene with [M(H<sub>2</sub>O)<sub>9</sub>]<sup>3+</sup> at the B3LYP/6-311G(2df,p) level of theory.<sup>a</sup>

| Reactions                                                                                                                                                                                                                              | $\Delta G_{\text{aq}}$ (kcal/mol) | $\Delta\Delta G$ (kcal/mol) |
|----------------------------------------------------------------------------------------------------------------------------------------------------------------------------------------------------------------------------------------|-----------------------------------|-----------------------------|
| $[\text{M}(\text{H}_2\text{O})_9]^{3+}_{\text{aq}} + 3\text{NO}_3^-_{\text{aq}} + \text{L}^{\text{a}}_{\text{nitro}} \rightarrow \text{ML}^{\text{a}}(\text{NO}_3)_{3, \text{nitro}} + 9\text{H}_2\text{O}_{\text{aq}}$                | -85.03/-51.71                     | -33.32                      |
| $[\text{M}(\text{H}_2\text{O})_9]^{3+}_{\text{aq}} + 3\text{NO}_3^-_{\text{aq}} + \text{L}^{\text{b}}_{\text{nitro}} \rightarrow \text{ML}^{\text{b}}(\text{NO}_3)_{3, \text{nitro}} + 9\text{H}_2\text{O}_{\text{aq}}$                | -67.52/-37.15                     | -30.37                      |
| $[\text{M}(\text{H}_2\text{O})_9]^{3+}_{\text{aq}} + 3\text{NO}_3^-_{\text{aq}} + \text{L}^{\text{c}}_{\text{nitro}} \rightarrow \text{ML}^{\text{c}}(\text{NO}_3)_{3, \text{nitro}} + 9\text{H}_2\text{O}_{\text{aq}}$                | -59.24/-31.50                     | -27.74                      |
| $[\text{M}(\text{H}_2\text{O})_9]^{3+}_{\text{aq}} + 2\text{L}^{\text{a}}_{\text{nitro}} \rightarrow [\text{M}(\text{L}^{\text{a}})_2]^{3+}_{\text{nitro}} + 9\text{H}_2\text{O}_{\text{aq}}$                                          | -75.05/-38.28                     | -36.77                      |
| $[\text{M}(\text{H}_2\text{O})_9]^{3+}_{\text{aq}} + 2\text{L}^{\text{b}}_{\text{nitro}} \rightarrow [\text{M}(\text{L}^{\text{b}})_2]^{3+}_{\text{nitro}} + 9\text{H}_2\text{O}_{\text{aq}}$                                          | -76.74/-48.26                     | -28.49                      |
| $[\text{M}(\text{H}_2\text{O})_9]^{3+}_{\text{aq}} + 2\text{L}^{\text{c}}_{\text{nitro}} \rightarrow [\text{M}(\text{L}^{\text{c}})_2]^{3+}_{\text{nitro}} + 9\text{H}_2\text{O}_{\text{aq}}$                                          | -72.29/-44.11                     | -28.17                      |
| $[\text{M}(\text{H}_2\text{O})_9]^{3+}_{\text{aq}} + 2\text{L}^{\text{a}}_{\text{nitro}} + \text{NO}_3^-_{\text{aq}} \rightarrow [\text{M}(\text{L}^{\text{a}})_2(\text{NO}_3)]^{2+}_{\text{nitro}} + 9\text{H}_2\text{O}_{\text{aq}}$ | -78.50/-49.89                     | -28.61                      |
| $[\text{M}(\text{H}_2\text{O})_9]^{3+}_{\text{aq}} + 2\text{L}^{\text{b}}_{\text{nitro}} + \text{NO}_3^-_{\text{aq}} \rightarrow [\text{M}(\text{L}^{\text{b}})_2(\text{NO}_3)]^{2+}_{\text{nitro}} + 9\text{H}_2\text{O}_{\text{aq}}$ | -69.21/-38.97                     | -30.25                      |
| $[\text{M}(\text{H}_2\text{O})_9]^{3+}_{\text{aq}} + 2\text{L}^{\text{c}}_{\text{nitro}} + \text{NO}_3^-_{\text{aq}} \rightarrow [\text{M}(\text{L}^{\text{c}})_2(\text{NO}_3)]^{2+}_{\text{nitro}} + 9\text{H}_2\text{O}_{\text{aq}}$ | -67.33/-43.36                     | -23.97                      |

<sup>a</sup>... /... represents results of M=Am and M=Eu, respectively.
